# Supplementary material for: Efficacy of cryotherapy plus topical Juniperus excelsa M. Bieb cream versus cryotherapy plus placebo in the treatment of Old World cutaneous leishmaniasis: A triple-blind randomized controlled clinical trial
Source: PubMed Central journal article supplement (PMC5655399; doi:10.1371/journal.pntd.0005957), 2017-10-05
Supplement: pntd.0005957.s008.pdf [file pntd.0005957.s008.pdf]

**Table 3-** Volatile constituents of both the plant methanol extract and prepared JE cream<sup>1</sup>

| No. | Component                | Area % (Extract) | Area % (Cream) | KI <sup>C</sup> | KI <sup>R</sup> |
|-----|--------------------------|------------------|----------------|-----------------|-----------------|
| 1   | $\alpha$ -Pinene         | -                | 0.24           | 935             | 939             |
| 2   | Limonene                 | -                | 0.21           | 1030            | 1029            |
| 3   | Linalool                 | 1.02             | 0.34           | 1100            | 1096            |
| 4   | trans-Pinocarveol        | -                | 0.27           | 1142            | 1139            |
| 5   | Borneol                  | 0.36             | 0.38           | 1168            | 1168            |
| 6   | $\alpha$ - Terpineol     | 0.31             | -              | 1193            | 1188            |
| 7   | n-Dodecane               | -                | 0.45           | 1200            | 1200            |
| 8   | n-Decanol                | -                | 0.19           | 1272            | 1269            |
| 9   | Thymol                   | 0.71             | -              | 1291            | 1290            |
| 10  | n-Tridecane              | -                | 0.53           | 1300            | 1300            |
| 11  | Carvacrol                | 1.55             | -              | 1301            | 1290            |
| 12  | $\alpha$ -Cubebene       | 0.5              | -              | 1353            | 1348            |
| 13  | Hexyl hexanoate          | -                | 0.3            | 1387            | 1383            |
| 14  | n-Tetradecane            | -                | 0.83           | 1400            | 1400            |
| 15  | $\beta$ -Funebrene       | -                | 1.37           | 1419            | 1414            |
| 16  | trans-Caryophyllene      | -                | 0.32           | 1425            | 1419            |
| 17  | $\alpha$ -Humulene       | -                | 0.37           | 1459            | 1454            |
| 18  | n-Dodecanol              | -                | 2.74           | 1477            | 1472            |
| 19  | $\gamma$ -Muurolene      | 0.53             | 0.22           | 1478            | 1479            |
| 20  | $\alpha$ -Amorphene      | 0.71             | -              | 1481            | 1484            |
| 21  | Germacrene D             | 0.53             | -              | 1497            | 1485            |
| 22  | n-pentadecane            | -                | 1.63           | 1503            | 1500            |
| 23  | $\alpha$ -Muurolene      | 1.72             | -              | 1505            | 1500            |
| 24  | $\gamma$ -Cadinene       | 1.51             | -              | 1519            | 1513            |
| 25  | Butylated hydroxytoluene | -                | <b>34.74</b>   | 1524            | 1515            |
| 26  | Methyl dodecanoate       | 1.45             | -              | 1525            | 1525            |
| 27  | $\Delta$ -Cadinene       | 4.42             | 0.65           | 1528            | 1523            |
| 28  | Elemol                   | <b>13.36</b>     | 0.7            | 1555            | 1549            |
| 29  | Germacrene B             | -                | 0.45           | 1564            | 1561            |
| 30  | Dodecanoic acid          | 1.78             | -              | 1570            | 1566            |
| 31  | Spathulenol              | 0.6              | 0.73           | 1582            | 1578            |
| 32  | Caryophyllene oxide      | 0.83             | -              | 1588            | 1583            |
| 33  | Ethyl dodecanoate        | 0.42             | -              | 1593            | 1595            |
| 34  | n-Hexadecane             | -                | 1.37           | 1600            | 1600            |
| 35  | $\beta$ -Oplophenone     | 1.23             | -              | 1613            | 1607            |
| 36  | Cedrol                   | -                | <b>13.66</b>   | 1613            | 1619            |
| 37  | $\alpha$ -Cadinol        | <b>7.9</b>       | 1.17           | 1636            | 1640            |
| 38  | $\beta$ -Eudesmol        | <b>7.51</b>      | 0.79           | 1647            | 1650            |
| 39  | $\alpha$ -Eudesmol       | <b>30.02</b>     | 0.46           | 1660            | 1653            |
| 40  | n-Heptadecane            | 1.16             | 0.87           | 1698            | 1700            |
| 41  | Methyl tetradecanoate    | 0.91             | -              | 1723            | 1723            |
| 42  | n-Octadecane             | -                | 0.64           | 1797            | 1800            |
| 43  | n-Hexadecanol            | -                | <b>19.99</b>   | 1886            | 1875            |

|    |                             |              |              |      |      |
|----|-----------------------------|--------------|--------------|------|------|
| 44 | n-Nonadecan                 | -            | 0.24         | 1898 | 1900 |
| 45 | Methyl hexadecanoate        | 0.84         | -            | 1923 | 1921 |
| 46 | Hexadecanoic acid           | 1.26         | -            | 1958 | 1960 |
| 47 | n-Eicosane                  | 0.69         | 0.19         | 1996 | 2000 |
| 48 | n-octadecanol               | -            | <b>8.72</b>  | 2085 | 2077 |
| 49 | Methyl linoleate            | 0.39         | -            | 2091 | 2085 |
|    | <b>Total identification</b> | <b>84.22</b> | <b>95.76</b> | -    | -    |
|    | <b>Monoterpenes</b>         | <b>3.95</b>  | <b>1.1</b>   | -    | -    |
|    | <b>Sesquiterpenes</b>       | <b>75.02</b> | <b>21.29</b> | -    | -    |
|    | <b>Phenols</b>              | -            | <b>34.74</b> |      |      |
|    | <b>Hydrocarbons</b>         | <b>5.25</b>  | <b>38.63</b> | -    | -    |

<sup>1</sup>The significance of bold is to present the most abundant constituents. Compounds have been identified by combination of both mass spectra and retention indices. RI represents the retention indices which were calculated against C8-C24 n-alkanes in the mentioned column. Compounds have been sorted with respect to retention indices on HP-5 MS capillary column.
